# Supplementary material for: Adaptive Evolution of the Chlamydia trachomatis Dominant Antigen Reveals Distinct Evolutionary Scenarios for B- and T-cell Epitopes: Worldwide Survey
Source: PubMed Central journal article supplement (PMC2950151; doi:10.1371/journal.pone.0013171), 2010-10-05
Supplement: pone.0013171.s001.pdf [file pone.0013171.s001.pdf]

### Serovar A - (Har13)

MKLLKSVLFAALSSASSLQALPVGNPAEPLSMIDGILWEGFGGDPDCPCTTWCDAISMRMGYYGDFVDRVLKTDVNEKFMGAAAPTTSSDVAGLEKDPVANVARNPAYGKHMQDAEMFTNAA<sup>1</sup>YMALNIWDRFDVFC<sup>2</sup>TLGATTG<sup>3</sup>YLK<sup>4</sup>GN<sup>5</sup>SASF<sup>6</sup>

NLVGLFGTKTQSSGFDTANLNPNTALNQAVELYD<sup>7</sup>TTFAWSVGARAALWECGCATLGASFOYAQSKPKVEELN<sup>8</sup>VLCNASEFTINPKPGYVGAEFPLDITAGTEAATG<sup>9</sup>TKDASIDYHEWQASLALS<sup>10</sup>YRLNMF<sup>11</sup>TPYIG<sup>12</sup>VK<sup>13</sup>WSRV<sup>14</sup>SFDADTIRIAQPK

LAKPVLDTTLNPTIAGKGTWSSAGDENELADTMQIVSLQLNKMKS<sup>15</sup>SRKSCGIAVGT<sup>16</sup>TVADKYAVTVETRLIDERA<sup>17</sup>AHVNAQFRF.

### Serovar C - (TW3)

MKLLKSVLFAALSSASSLQALPVGNPAEPLSMIDGILWEGFGGDPDCPCTTWCDAISMRVGYGDFVDRVLKTDVNEKFMGAAAPTTSSDVAGLQNDPTTNVARNPAYGKHMQDAEMFTNAA<sup>1</sup>YMALNIWDRFDVFC<sup>2</sup>TLGATTG<sup>3</sup>YLK<sup>4</sup>GN<sup>5</sup>SASF<sup>6</sup>

NLVGLFGTKTQSSFN<sup>7</sup>TAKLIPNTALNEAVELYINTTFAWSVGARAALWECGCATLGASFOYAQSKPKVEELN<sup>8</sup>VLCNASEFTINPKPGYVGAEFPLNITAGTEAATG<sup>9</sup>TKDASIDYHEWQASLALS<sup>10</sup>YRLNMF<sup>11</sup>TPYIG<sup>12</sup>VK<sup>13</sup>WSRV<sup>14</sup>SFDADTIRIAQPK

LAEAILDVTTLNPTIAGKGTWSSAGDENELADTMQIVSLQLNKMKS<sup>15</sup>SRKSCGIAVGT<sup>16</sup>TVADKYAVTVETRLIDERA<sup>17</sup>AHVNAQFRF.

### Serovar H - (UW4)

MKLLKSVLFAALSSASSLQALPVGNPAEPLSMIDGILWEGFGGDPDCPCTTWCDAISMRVGYGDFVDRVLKTDVNEKFMGAAAPTTNDAADLQNDPKTNVARNPAYGKHMQDAEMFTNAA<sup>1</sup>YMALNIWDRFDVFC<sup>2</sup>TLGATTG<sup>3</sup>YLK<sup>4</sup>GN<sup>5</sup>SASF<sup>6</sup>

NLVGLFGTKTQSSDFNTAKLIPNIALNRAVELYD<sup>7</sup>TTFAWSVGARAALWECGCATLGASFOYAQSKPKVEELN<sup>8</sup>VLCNASEFTINPKPGYVGAEFPLDITAGTEAATG<sup>9</sup>TKDASIDYHEWQASLALS<sup>10</sup>YRLNMF<sup>11</sup>TPYIG<sup>12</sup>VK<sup>13</sup>WSRV<sup>14</sup>SFDADTIRIAQPK

LAEAILDVTTLNPTIAGKGTWSSAGDENELADTMQIVSLQLNKMKS<sup>15</sup>SRKSCGIAVGT<sup>16</sup>TVADKYAVTVETRLIDERA<sup>17</sup>AHVNAQFRF.

### Serovar I - (UW12)

MKLLKSVLFAALSSASSLQALPVGNPAEPLSMIDGILWEGFGGDPDCPCTTWCDAISMRMGYYGDFVDRVLKTDVNEKFMGAAAPTTKDVAGLENDPTTNVARNPNAYGKHMQDAEMFTNAA<sup>1</sup>YMALNIWDRFDVFC<sup>2</sup>TLGATTG<sup>3</sup>YLK<sup>4</sup>GN<sup>5</sup>SASF<sup>6</sup>

NLVGLFGTKTQSSNFNTAKLIPNAAALNQAVELYD<sup>7</sup>TTFAWSVGARAALWECGCATLGASFOYAQSKPKVEELN<sup>8</sup>VLCNASEFTINPKPGYVGAEFPLDITAGTEAATG<sup>9</sup>TKDASIDYHEWQASLALS<sup>10</sup>YRLNMF<sup>11</sup>TPYIG<sup>12</sup>VK<sup>13</sup>WSRV<sup>14</sup>SFDADTIRIAQPK

LAEAILDVTTLNPTIAGKGTWSSAGDENELADTMQIVSLQLNKMKS<sup>15</sup>SRKSCGIAVGT<sup>16</sup>TVADKYAVTVETRLIDERA<sup>17</sup>AHVNAQFRF.

### Serovar Ia - (IU4168)

MKLLKSVLFAALSSASSLQALPVGNPAEPLSMIDGILWEGFGGDPDCPCTTWCDAISMRMGYYGDFVDRVLKTDVNEKFMGAAAPTTKDIAGLENDPTTNVARNPNAYGKHMQDAEMFTNAA<sup>1</sup>YMALNIWDRFDVFC<sup>2</sup>TLGATTG<sup>3</sup>YLK<sup>4</sup>GN<sup>5</sup>SASF<sup>6</sup>

NLVGLFGTKTQSSNFNTAKLIPNAAALNQAVELYD<sup>7</sup>TTFAWSVGARAALWECGCATLGASFOYAQSKPKVEELN<sup>8</sup>VLCNASEFTINPKPGYVGAEFPLDITAGTEAATG<sup>9</sup>TKDASIDYHEWQASLALS<sup>10</sup>YRLNMF<sup>11</sup>TPYIG<sup>12</sup>VK<sup>13</sup>WSRV<sup>14</sup>SFDADTIRIAQPK

LAEAILDVTTLNPTIAGKGTWSSAGDENELADTMQIVSLQLNKMKS<sup>15</sup>SRKSCGIAVGT<sup>16</sup>TVADKYAVTVETRLIDERA<sup>17</sup>AHVNAQFRF.

### Serovar J - (UW36)

MKLLKSVLFAALSSASSLQALPVGNPAEPLSMIDGILWEGFGGDPDCPCTTWCDAISMRMGYYGDFVDRVLKTDVNEKFMGAAAPTTSSDVAGLQNDPTTNVARNPAYGKHMQDAEMFTNAA<sup>1</sup>YMALNIWDRFDVFC<sup>2</sup>TLGATTG<sup>3</sup>YLK<sup>4</sup>GN<sup>5</sup>SASF<sup>6</sup>

NLVGLFGTKTQASSFN<sup>7</sup>TANLNPNTALNQAVELYD<sup>8</sup>TTFAWSVGARAALWECGCATLGASFOYAQSKPKVEELN<sup>9</sup>VLCNASEFTINPKPGYVGAEFPLDITAGTEAATG<sup>10</sup>TKDASIDYHEWQASLALS<sup>11</sup>YRLNMF<sup>12</sup>TPYIG<sup>13</sup>VK<sup>14</sup>WSRV<sup>15</sup>SFDADTIRIAQPK

LAEAILDVTTLNPTIAGKGTWSSAGDENELADTMQIVSLQLNKMKS<sup>16</sup>SRKSCGIAVGT<sup>17</sup>TVADKYAVTVETRLIDERA<sup>18</sup>AHVNAQFRF.

### Serovar Ja - (UA795)

MKLLKSVLFAALSSASSLQALPVGNPAEPLSMIDGILWEGFGGDPDCPCTTWCDAISMRMGYYGDFVDRVLKTDVNEKFMGAAAPTTSSDVAGLQNDPTTNVARNPAYGKHMQDAEMFTNAA<sup>1</sup>YMALNIWDRFDVFC<sup>2</sup>TLGATTG<sup>3</sup>YLK<sup>4</sup>GN<sup>5</sup>SASF<sup>6</sup>

NLVGLFGTKTQSSFN<sup>7</sup>TAKLIPNTALNQAVELYD<sup>8</sup>TTFAWSVGARAALWECGCATLGASFOYAQSKPKVEELN<sup>9</sup>VLCNASEFTINPKPGYVGAEFPLDITAGTEAATG<sup>10</sup>TKDASIDYHEWQASLALS<sup>11</sup>YRLNMF<sup>12</sup>TPYIG<sup>13</sup>VK<sup>14</sup>WSRV<sup>15</sup>SFDADTIRIAQPK

LAEAILDVTTLNPTIAGKGTWSSAGDENELADTMQIVSLQLNKMKS<sup>16</sup>SRKSCGIAVGT<sup>17</sup>TVADKYAVTVETRLIDERA<sup>18</sup>AHVNAQFRF.

### Serovar K - (UW31)

MKLLKSVLFAALSSASSLQALPVGNPAEPLSMIDGILWEGFGGDPDCPCTTWCDAISMRVGYGDFVDRVLKTDVNEKFMGAAAPTTSSDVAGLQNDPTTNVARNPAYGKHMQDAEMFTNAA<sup>1</sup>YMALNIWDRFDVFC<sup>2</sup>TLGATTG<sup>3</sup>YLK<sup>4</sup>GN<sup>5</sup>SASF<sup>6</sup>

NLVGLFGTKTQYSKFN<sup>7</sup>TANLNPNTALDRAVVELYD<sup>8</sup>TTFAWSVGARAALWECGCATLGASFOYAQSKPKVEELN<sup>9</sup>VLCNASEFTINPKPGYVGAEFPLDITAGTEAATG<sup>10</sup>TKDASIDYHEWQASLALS<sup>11</sup>YRLNMF<sup>12</sup>TPYIG<sup>13</sup>VK<sup>14</sup>WSRV<sup>15</sup>SFDADTIRIAQPK

LAEAILDVTTLNPTIAGKGTWSSAGDENELADTMQIVSLQLNKMKS<sup>16</sup>SRKSCGIAVGT<sup>17</sup>TVADKYAVTVETRLIDERA<sup>18</sup>AHVNAQFRF.

### Serovar L3 - (404)

MKLLKSVLFAALSSASSLQALPVGNPAEPLSMIDGILWEGFGGDPDCPCTTWCDAISMRVGYGDFVDRVLKTDVNEKFMGAAAPTTSSDTAGLSNDPTTNVARNPAYGKHMQDAEMFTNAA<sup>1</sup>YMALNIWDRFDVFC<sup>2</sup>TLGATTG<sup>3</sup>YLK<sup>4</sup>GN<sup>5</sup>SASF<sup>6</sup>

NLVGLFGTKTQSTFN<sup>7</sup>TAKLIPNTALNQAVELYD<sup>8</sup>TTFAWSVGARAALWECGCATLGASFOYAQSKPKVEELN<sup>9</sup>VLCNASEFTINPKPGYVGAEFPLDITAGTEAATG<sup>10</sup>TKDASIDYHEWQASLALS<sup>11</sup>YRLNMF<sup>12</sup>TPYIG<sup>13</sup>VK<sup>14</sup>WSRV<sup>15</sup>SFDADTIRIAQPK

LAEAVLDTTLNPTIAGKGTWSSAGDENELADTMQIVSLQLNKMKS<sup>16</sup>SRKSCGIAVGT<sup>17</sup>TVADKYAVTVETRLIDERA<sup>18</sup>AHVNAQFRF.

**Figure S1. MOMP antigenic regions.** Outline of all B- and T-cell core epitopes mapped for the 17 baseline prototype strains representing the *C. trachomatis* genotypes. Amino acid residues belonging to constant domains of the protein are in black, while residues encompassing the variable surface-exposed domains are in red. The B-, CTL-, and Th-cell epitopes are underlined in black, purple, and

**green, respectively.** 1- Batteiger BE (1996), *Infect Immun* 64:542-547; 2- Zhong GM, Brunham RC (1991), *Infect Immun* 59:1141-1147; 3- Zhong , et al. (1990) *Infect Immun* 58:1450-1455; 4- Hayes, et al. (1990) *J Gen Microbiol* 136:1559-1566; 5- Stagg, et al. (1993) *Immunol* 79:1-9; Pal (1993) *J Gen Microbiol* 139:1565-1 570; Batteiger, et al. (1996) *Infect Immun* 64:2839-2841; 8- Arno, et al. (1998) *J Infect Dis* 178: 1713-1718; 9- Villeneuve, et al. (1994) *Microbiol* 140:2481-2487; 10- Qu, et al. (1993) *Infect Immun* 61:1365-1370; 11- Morrison, et al. (1992) In: *Sexually transmitted diseases*. NY: Raven Press. pp. 57–84; 12- Peterson, et al. (1991) *Infect Immun* 59:4147-4153; 13- Su, et al. (1990) *Infect Immun* 58:1017-1025; 14- Su H, Caldwell HD (1992) *J Exp Med* 175:227-235; 15- Colan, et al. (1988) *Mol Microbiol* 2:673-679; 16- Holland, et al. (1997) *Clin Exp Immunol* 107:44-49; 17- Kim, et al. (1999) *J Immunol* 162:6855-6866; 18- Kim SK, DeMars R (2001) *Curr Opin Immunol* 13:429-436; 19- Ortiz, et al. (1996) *J Immunol* 157:4554-4567.
